# Supplementary material for: Highly efficient solar to chemical conversion by an anthraquinone and Candida antarctica lipase B-based photocatalytic–enzymatic cascade
Source: Royal Society of Chemistry journal article supplement (doi:10.1039/d5cc06732d), 2025-12-26
Supplement: d5cc06732d1.pdf [file d5cc06732d1.pdf]

## Supporting information

### Highly efficient solar to chemical conversion by anthraquinone and *Candida antarctica* lipase B based photocatalytic-enzymatic Cascade

Yuting Li<sup>a, b</sup>, Jie Cheng<sup>b</sup>, Yinghuan Xu<sup>b</sup>, Jiacaan Zhu<sup>a</sup>, Xiahui Huang<sup>b</sup>, Pengcheng Zhang<sup>b</sup>, Hongzhang Wu<sup>d</sup>, Zhenjiang Cao<sup>c\*</sup>, Jianbo Zhao<sup>a\*</sup>, Kaipeng Cheng<sup>b\*</sup>

<sup>a</sup> School of Chemistry and Chemical Engineering, Tarim University, Alar 843300, PR China

<sup>b</sup> School of Chemistry and Chemical Engineering, Zhoukou Normal University, Zhoukou 466000, PR China

<sup>b</sup> School of Chemistry and Chemical Engineering, Tarim University, Alar 843300, PR China

<sup>c</sup> School of Chemistry, Xi'an Jiaotong University, Xi'an 710049, PR China

<sup>d</sup> Henan Key Laboratory of Rare Earth Functional Materials and Application, Zhoukou Normal University, Zhoukou 466000, PR China

## Experimental Section

### Materials

Zinc Nitrate Hexahydrate, 2-Methylimidazole, Sodium anthraquinone-2-sulfonate (SAS), (-)-Limonene, (+)-Limonene 1,2-epoxide and 2, 2'-azino-bis(3-ethylbenzothiazoline-6-sulfonic acid) (ABTS) were purchased from Shanghai Macklin Biochemical Co., Ltd. Horseradish Peroxidase (HRP,  $\geq 300$  u/mg) was purchased from Shanghai yuanye Bio-Technology Co., Ltd. *Candida antarctica* lipase B (CALB, 10000U/mg, liquid) was purchased from Novozymes. All chemicals were used without further processing.

### ZIF-8 Synthesis

ZIF-8 was synthesized as references reported with slightly differences[1]. Typically, 0.2 mL of  $\text{Zn}(\text{NO}_3)_2$  solution (0.31 M) was simultaneously added into 2 mL of 2-methylimidazole solution (1.25 M) and then stirred thoroughly at room temperature for 12 h. ZIF-8 was collected by centrifugation followed by methanol washing for 3 times, and was dried under vacuum at 80 °C for 12 h.

### SAS@ZIF-8 Synthesis

SAS was added into 2 mL of 2-methylimidazole solution (1.25 M), and was stirred until fully dissolved. Then 0.2 mL of  $\text{Zn}(\text{NO}_3)_2$  solution (0.31 M) was simultaneously added into the above mixture, and then stirred thoroughly at room temperature for 12 h. SAS@ZIF-8 was collected by centrifugation followed by methanol washing for 3 times, and was dried under vacuum at 80 °C for 12 h (Yield: 90 mg). The SAS concentration in the reactant range from 1.25 to 40 mM, and the encapsulation efficiency was obtained according to residue amount in supernatant by reading absorbance at 327 nm using UV-Vis spectrophotometer.

### SAS-CALB@ZIF-8 Synthesis

SAS was added into 2 mL of 2-methylimidazole solution (1.25 M) and CALB was added into 0.2 mL of  $\text{Zn}(\text{NO}_3)_2$  solution (0.31 M). The mixtures were stirred until fully dissolved. Then, the later mixture was simultaneously added into the former mixture and kept stirring for 12 h at room temperature. The solid was collected by centrifugation followed by washing using PBS buffer (pH = 7, 50 mM) for 3 times, and was

redispersed in 2 mL PBS buffer at 4 °C for further using. The SAS concentration in the reactant was 20 mM, and CALB dosage differ from 20 to 200  $\mu$ L. HPLC equipped with C18 column and UV detector was used here to measure the residue CALB in supernatant of first round centrifugation.

### **Photocatalytic Reaction**

The photocatalytic H<sub>2</sub>O<sub>2</sub> production performance of various catalysts was evaluated under white light irradiation using CEL-PCRD300-12 (Beijing China Education Au-Light Technology Co Ltd.) equipped with LED lamp beads, cooling fan, and power conditioner.

Typically, 4 mg SAS@ZIF-8 or equivalent SAS was dispersed or dissolved in O<sub>2</sub> saturated water. The mixture was irradiated for 4 h with stir, and samples were collected every hour to test the H<sub>2</sub>O<sub>2</sub> accumulation amount by enzymatic approach. For each test run, 50  $\mu$ L sample after centrifugation and dilution, 50  $\mu$ L ABTS (50 mM) and 50  $\mu$ L HRP (1 mg/mL) were added into 850  $\mu$ L PBS, and then shook for 5 min. UV-Vis spectrophotometer was used to read the absorbance at 419 nm, and the yield can be obtained according to the standard curve. For scavenger experiments, AgNO<sub>3</sub>, BQ or TBA was added in the reactant with concentration of 10 mM.

### **Photo-Enzymatic Cascade**

SCZ photo-enzymatic cascade: SCZ was stored in PBS at 4 °C before using as described above. Typically, 500  $\mu$ L SCZ, ethyl acetate (3 M), isopropanol (25 v/v %) and limonene (0.1 M) were added into O<sub>2</sub> saturated PBS (pH = 7.0, 50 mM) with final volume of 4 mL. After irradiation for 1 h, 200  $\mu$ L mixture was collected followed by adding 160  $\mu$ L ethanol solution of n-dodecane (1/20000 v/v, as internal standard and to quench the reaction). GC equipped with FID detector was used here to measure the limonene oxide yield.

CALB + H<sub>2</sub>O<sub>2</sub>: Equivalent CALB (50  $\mu$ L), H<sub>2</sub>O<sub>2</sub> (2.5 mM according to the H<sub>2</sub>O<sub>2</sub> accumulation amount using SCZ), ethyl acetate (3 M), isopropanol (25 v/v %) and limonene (0.1 M) were added into O<sub>2</sub> saturated PBS (pH = 7.0, 50 mM) with final volume of 4 mL. The reaction started with all chemicals added, and lasted for 1 h.

CALB@ZIF-8 + SAS: 500  $\mu$ L SCZ, SAS, ethyl acetate (3 M), isopropanol (25 v/v %)

and limonene (0.1 M) were added into O<sub>2</sub> saturated PBS (pH = 7.0, 50 mM) with final volume of 4 mL. The reaction started by turning on light, and lasted for 1 h.

CALB + SAS@ZIF-8-20: 8 mg SAS, equivalent CALB (50  $\mu$ L), ethyl acetate (3 M), isopropanol (25 v/v %) and limonene (0.1 M) were added into O<sub>2</sub> saturated PBS (pH = 7.0, 50 mM) with final volume of 4 mL. The reaction started by turning on light, and lasted for 1 h.

CALB + SAS: equivalent CALB (50  $\mu$ L), SAS, ethyl acetate (3 M), isopropanol (25 v/v %) and limonene (0.1 M) were added into O<sub>2</sub> saturated PBS (pH = 7.0, 50 mM) with final volume of 4 mL. The reaction started by turning on light, and lasted for 1 h.

### **DFT Calculation**

The reaction path calculations were performed with the projector-augmented-wave (PAW) method as implemented in VASP.[2] The PBE generalized-gradient approximation was adopted for the exchange–correlation functional.[3] A plane-wave basis set was employed with a kinetic-energy cutoff of 400 eV. Owing to the large unit cell of ZIF-8, only the  $\Gamma$ -point was used for Brillouin-zone sampling. Electronic iterations were converged to an energy tolerance of 10<sup>-8</sup> eV, while the geometry relaxations were considered converged when the maximum force was smaller than 0.02 eV  $\text{\AA}^{-1}$ . Gaussian smearing with a width of 0.05 eV was applied during structural optimization.

### **Characterization**

Phase analysis of ZIF-8 and SAS@ZIF-8 series were conducted using D8 ENDEAVOR (Bruker, Germany). The FTIR spectra was recorded using Nicolet iS20 (thermo Fisher Scientific, USA), time resolved photoluminescence decay spectra was recorded using FLS1000 (Edinburgh, UK), EPR spectra was recorded using EMXplus-6/1 (Bruker, Germany), surface morphology was examined using JSM-IT800 (JEOL, Japan). The band gaps and absorption edges were measured using UV-Vis DRS (PerkinElmer Lambda 950, USA).

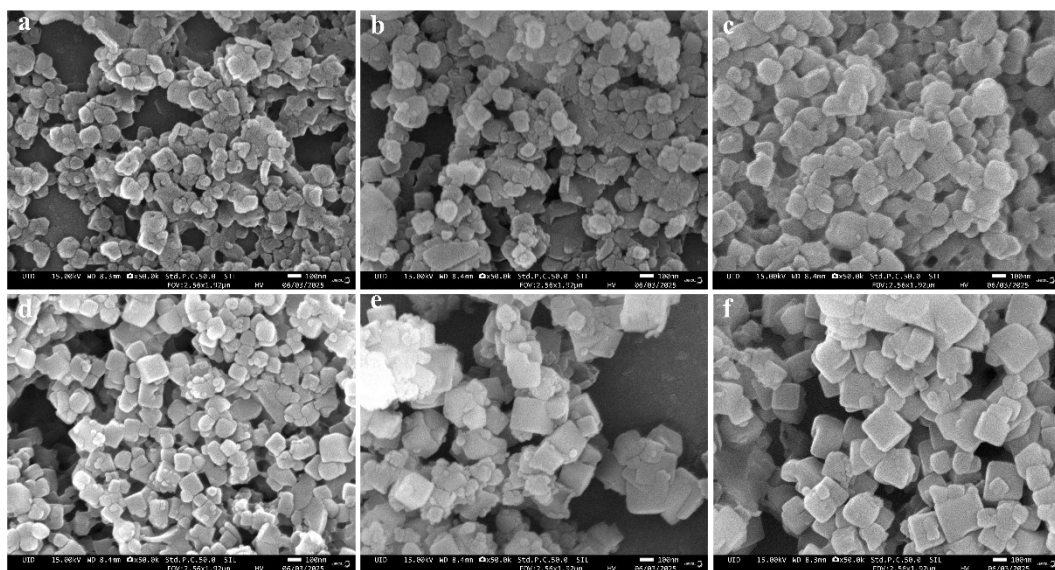

Figure S1: SEM images of SAS@ZIF-8 with different SAS encapsulation amount (a: 40 mM, b: 20 mM, c: 10 mM, d: 5 mM, e: 2.5 mM, f: 1.25 mM)

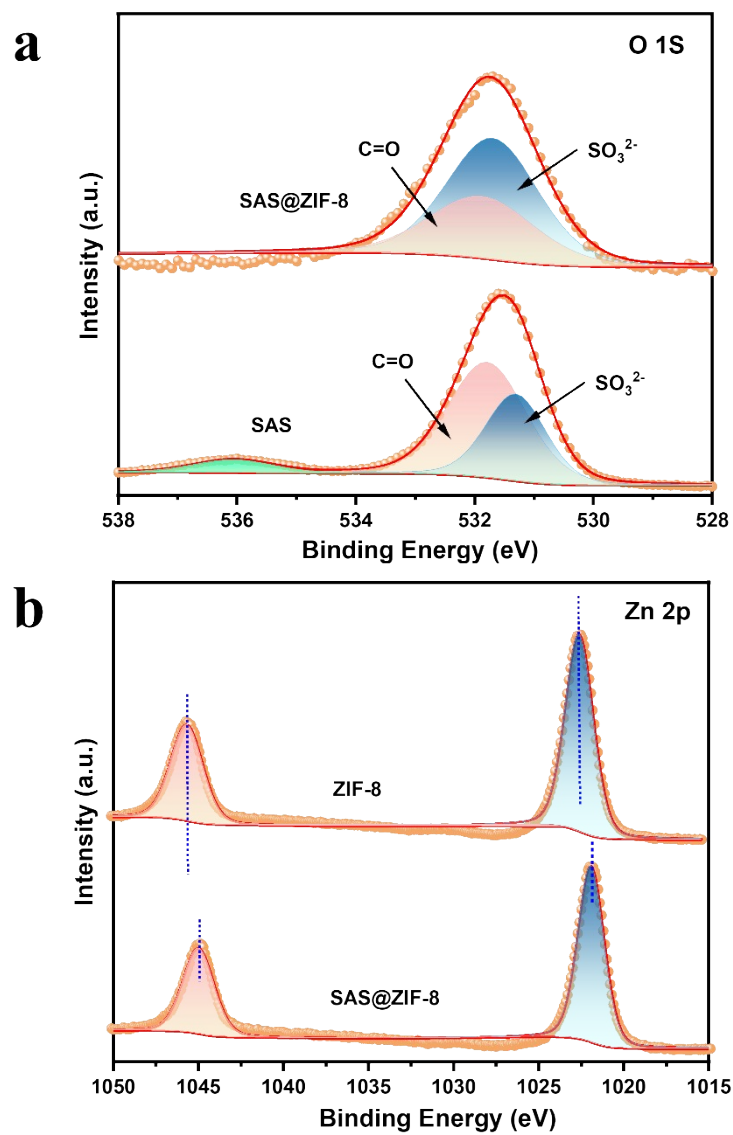

Figure S2: (a) XPS spectra of O 1s orbit of SAS and SAS@ZIF-8, (b) XPS spectra of Zn 2p orbit of ZIF-8 and SAS@ZIF-8.

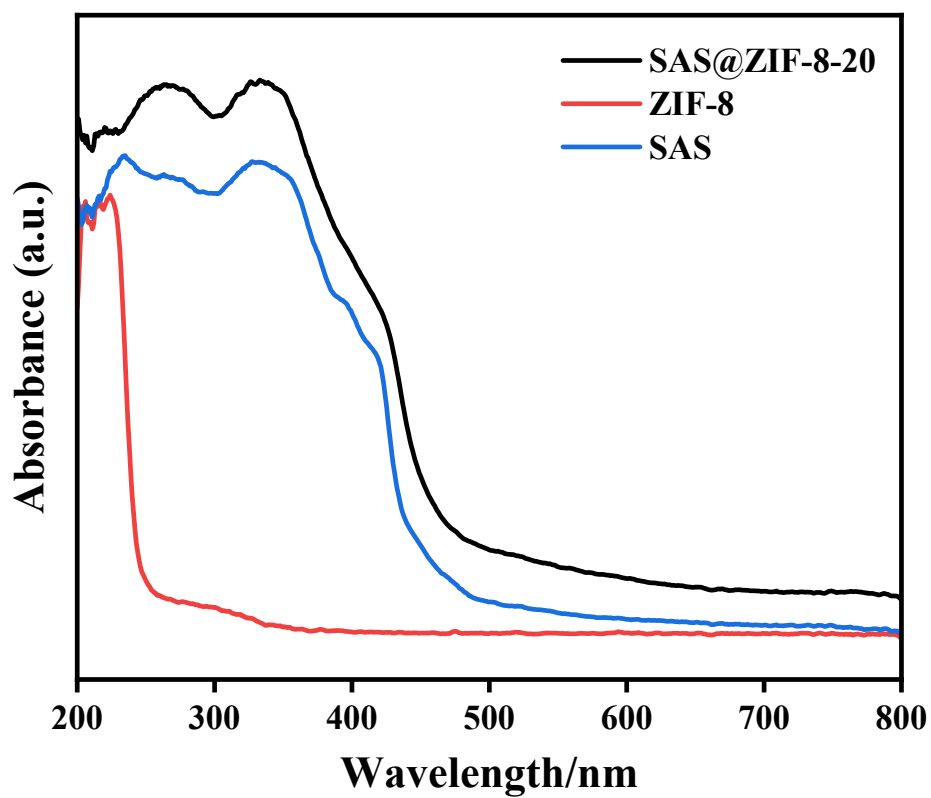

Figure S3: UV-Vis DRS spectra of SAS, ZIF-8 and SAS@ZIF-8.

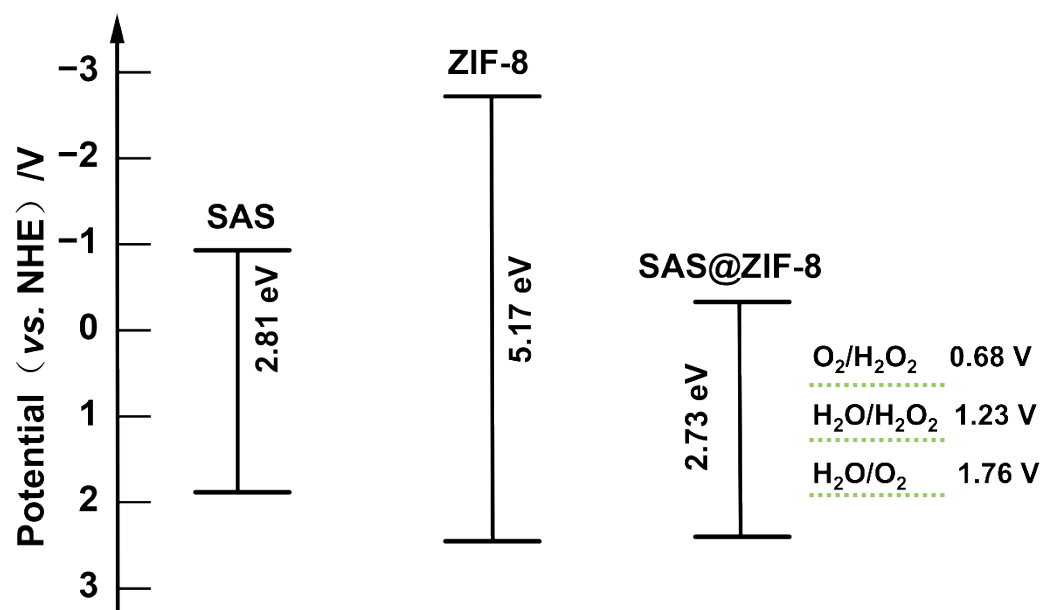

Figure S4: Energy band location of SAS, ZIF-8 and SAS@ZIF-8-20



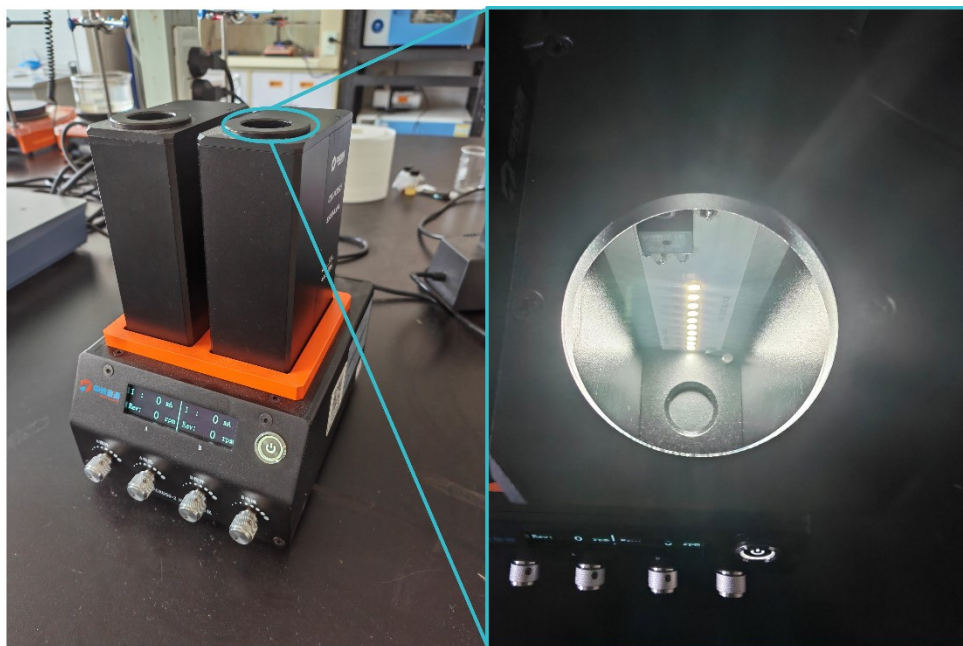

Figure S5: Picture of photocatalytic reactor.

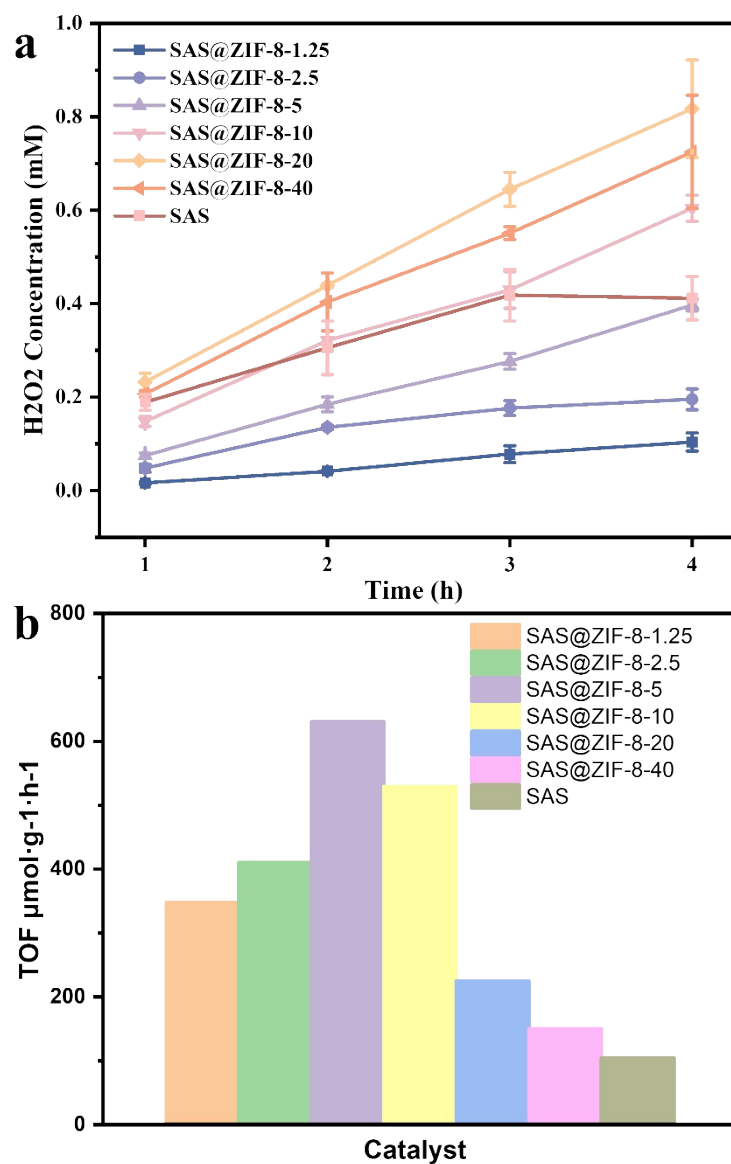

Figure S6: (a)  $H_2O_2$  concentration increasing with time, (b) TOF of SAS@ZIF-8 series and SAS.

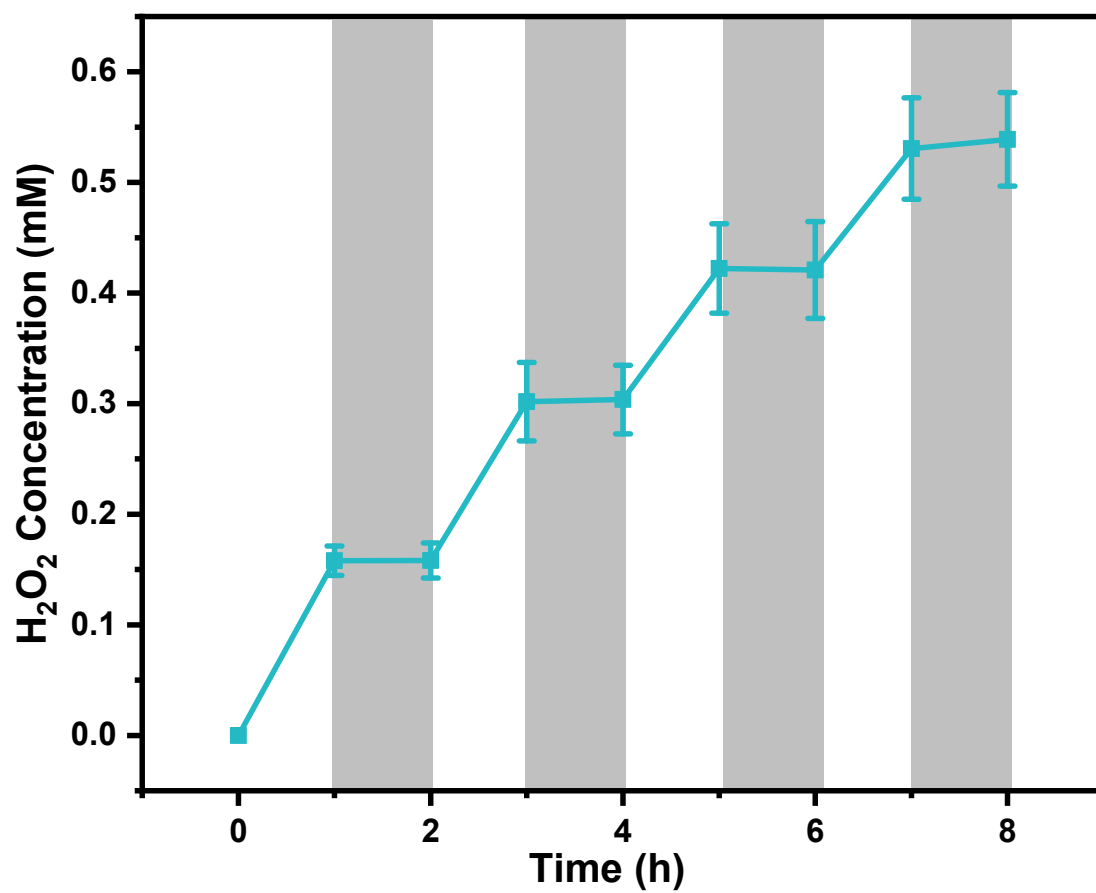

Figure S7: Light on-off cycling with SAS@ZIF-8-20 as catalyst.

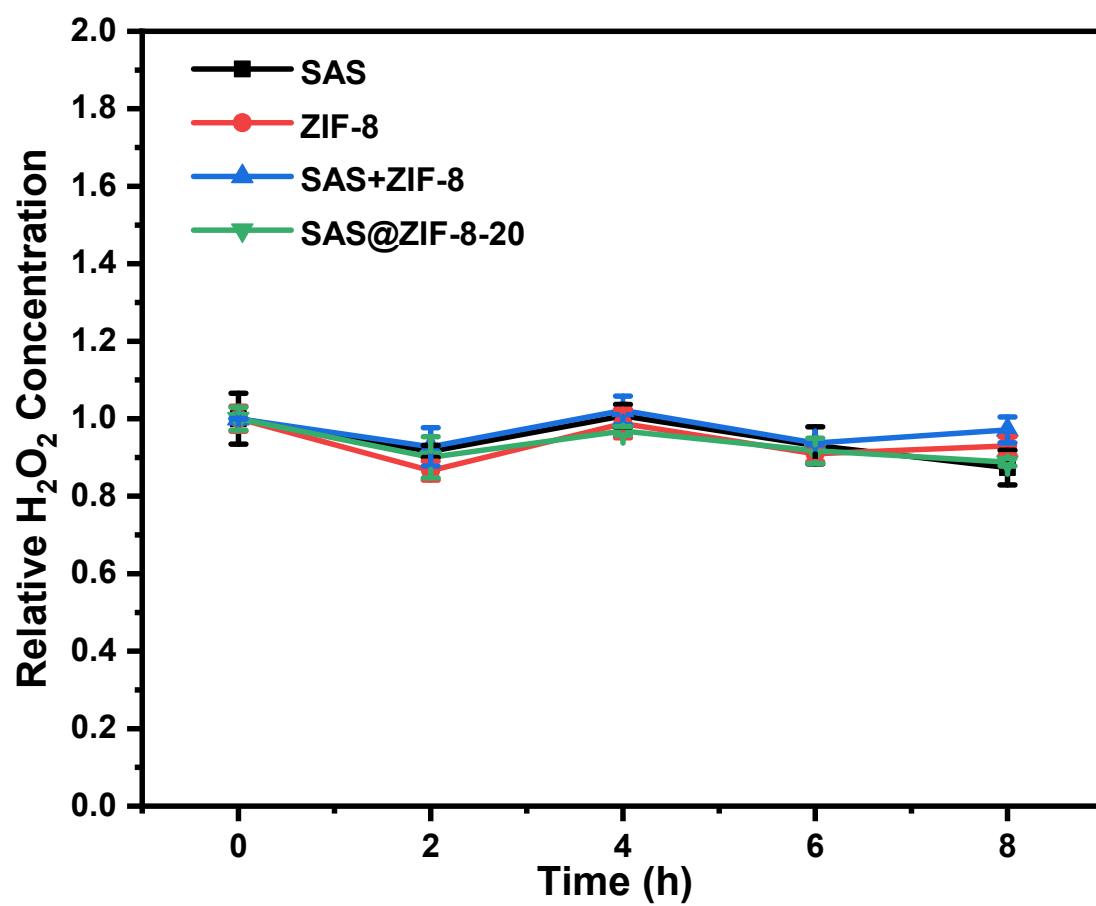

Figure S8: Trace of  $H_2O_2$  content presented with different catalyst

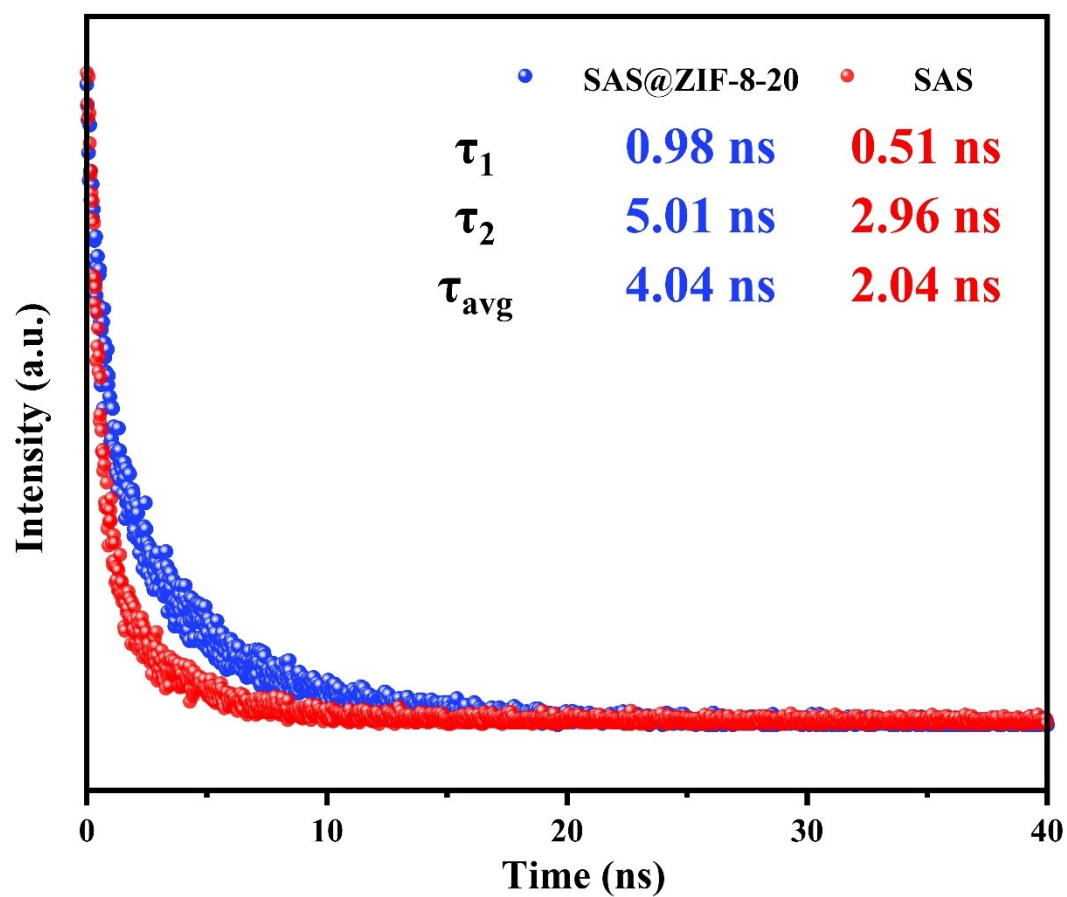

Figure S9: Time resolved photoluminescence decay spectra of SAS and SAS@ZIF-8-20.

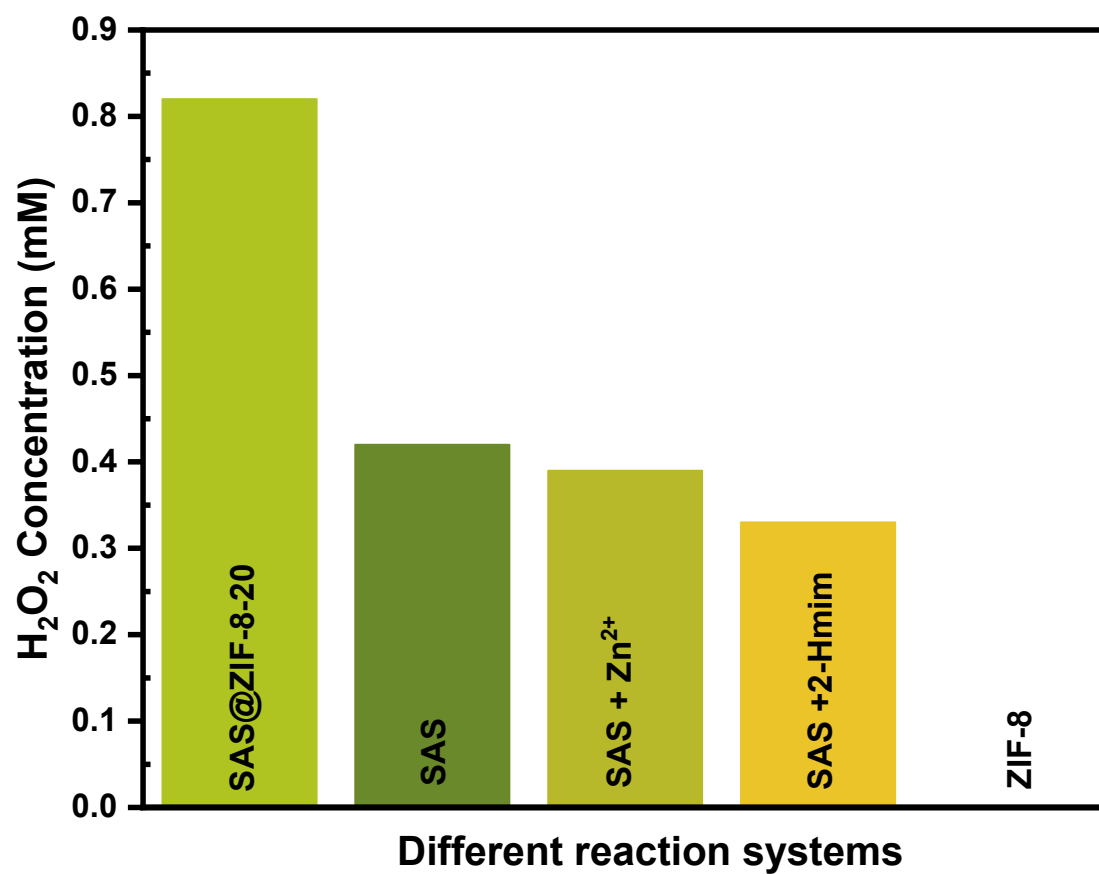

Figure S10: Control experiment of ZIF-8,  $\text{Zn}^{2+}$  and 2-methylimidazole on  $\text{H}_2\text{O}_2$  generation

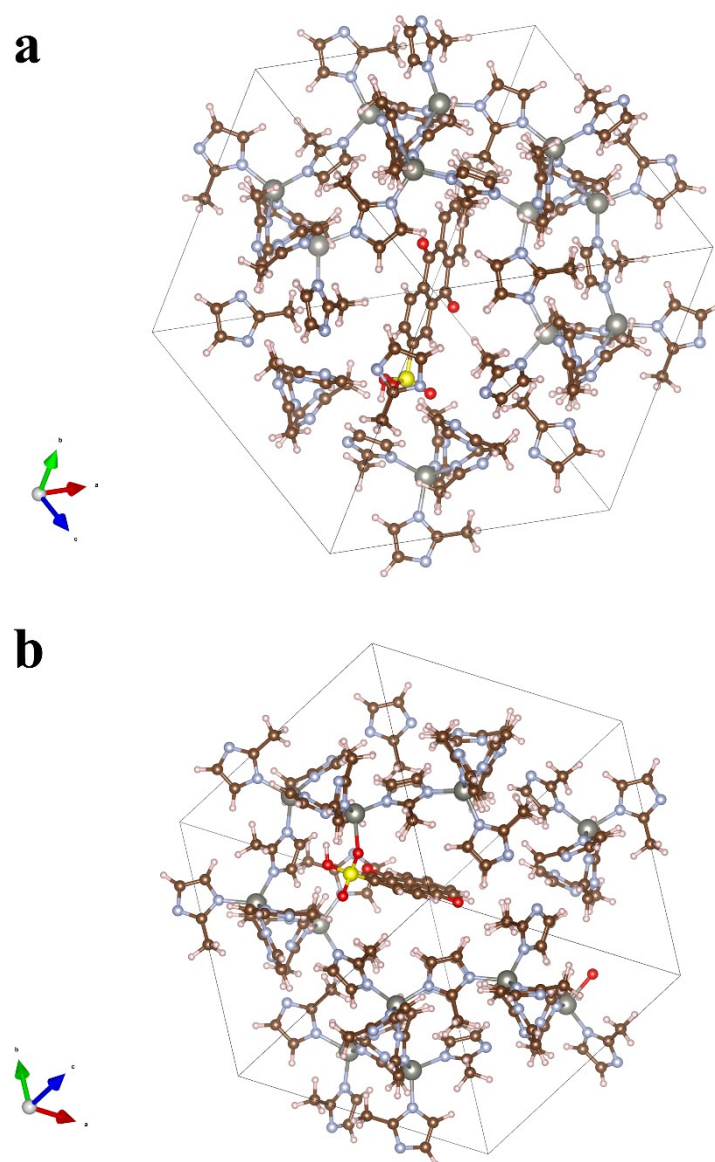

Figure S11: Models of SAS and ZIF-8 composites by physically encapsulation (a) or by interaction (b)

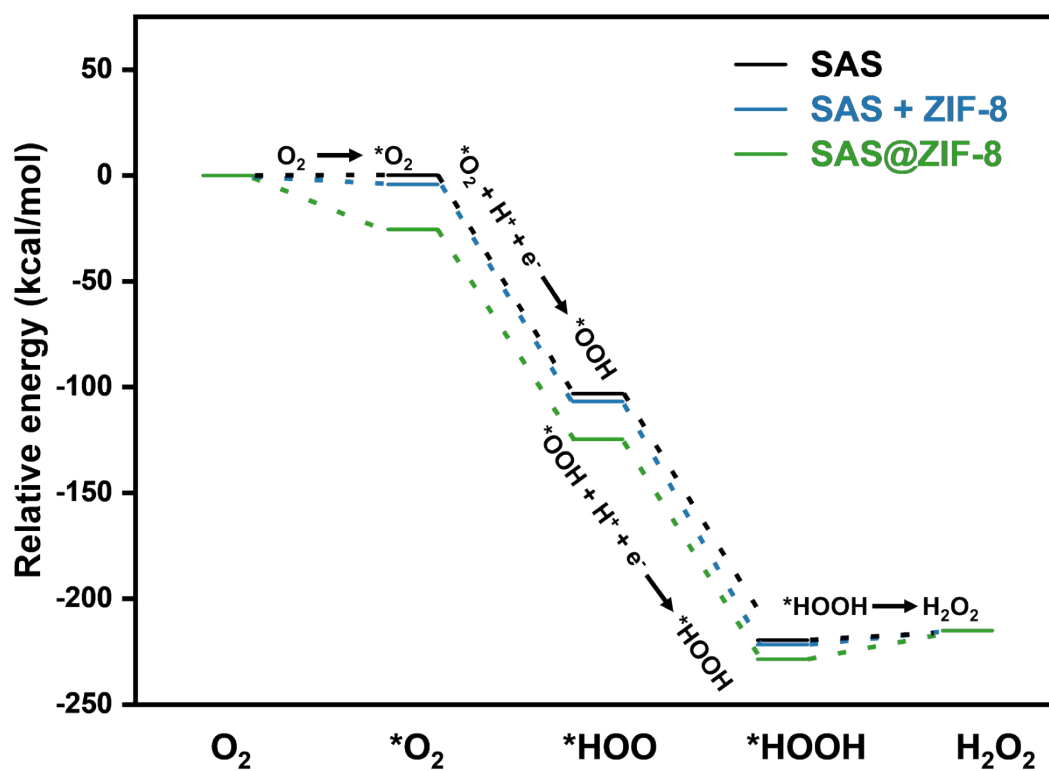

Figure S12: Potential energy diagram describing the  $O_2$ -to- $H_2O_2$  photocatalytic conversion over these three catalysts



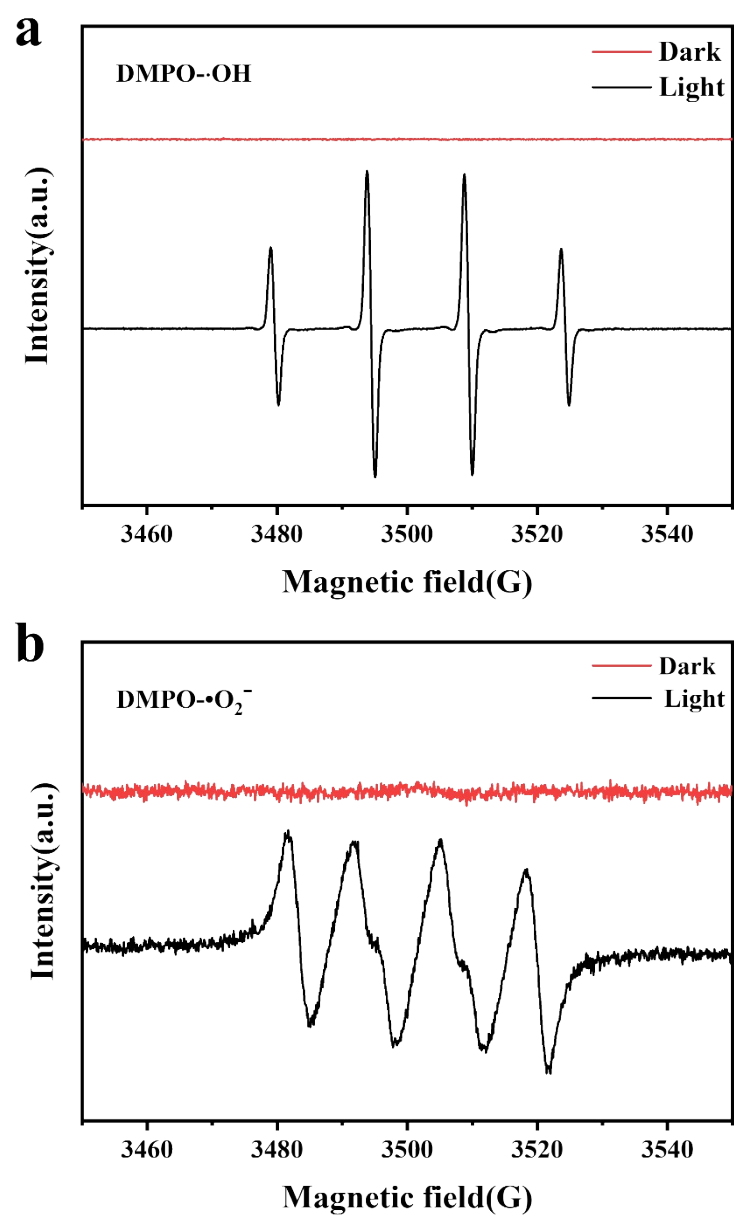

Figure S13: Room-temperature EPR spectra measured with and without light irradiation.

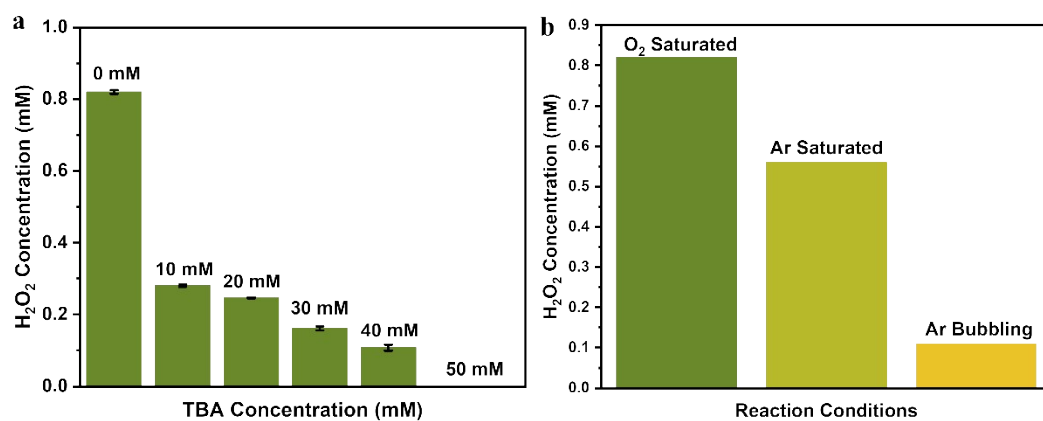

Figure S14: a, Photocatalytic performance under different TBA scavenger amount and Ar Pre-saturated condition; b, Photocatalytic performance under different atmosphere.

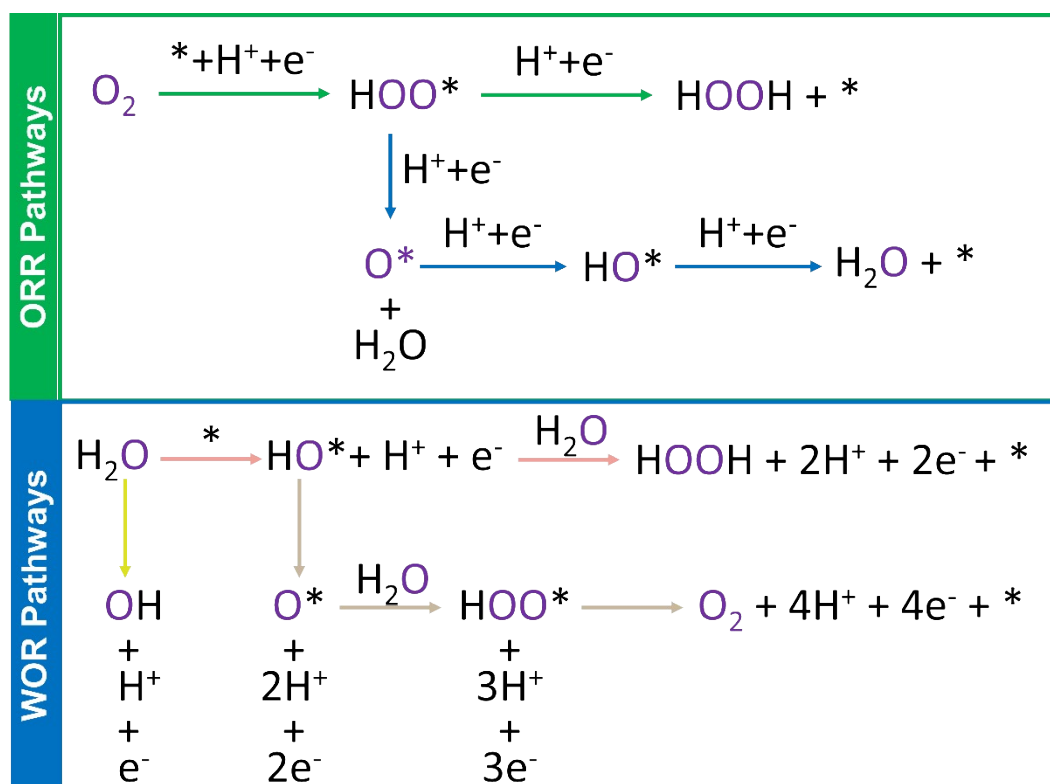

Figure S15: Reaction pathways of 2/4 e<sup>-</sup> ORR and 1/2/4 e<sup>-</sup> WOR

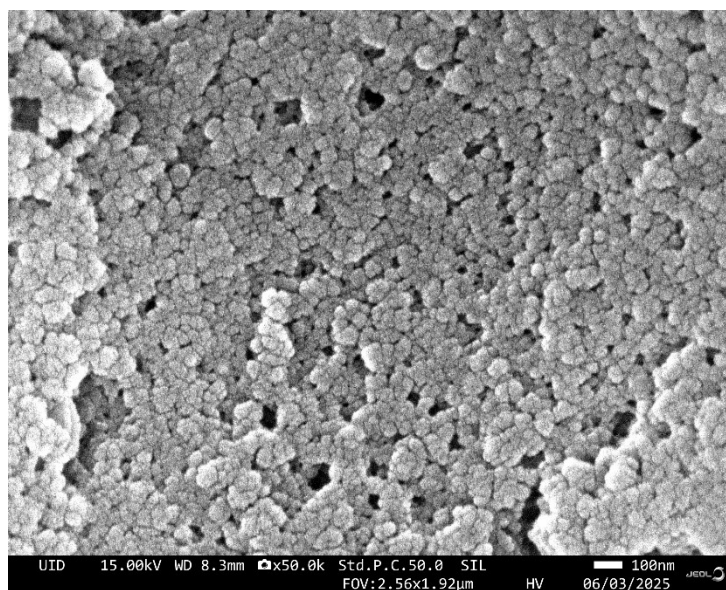

Figure S16: SEM image of SAS-CALB@ZIF-8

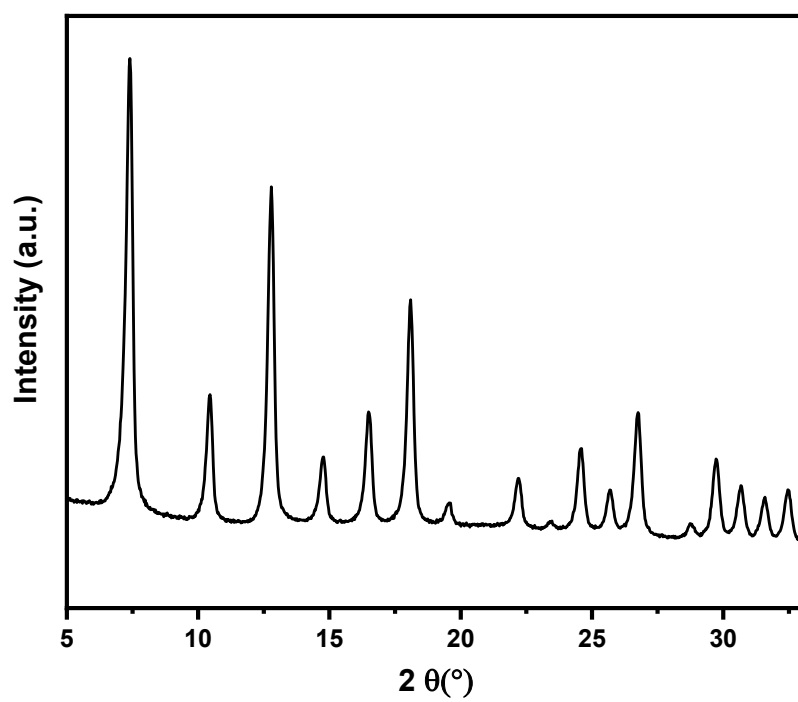

Figure S17: XRD spectra of SAS-CALB@ZIF-8

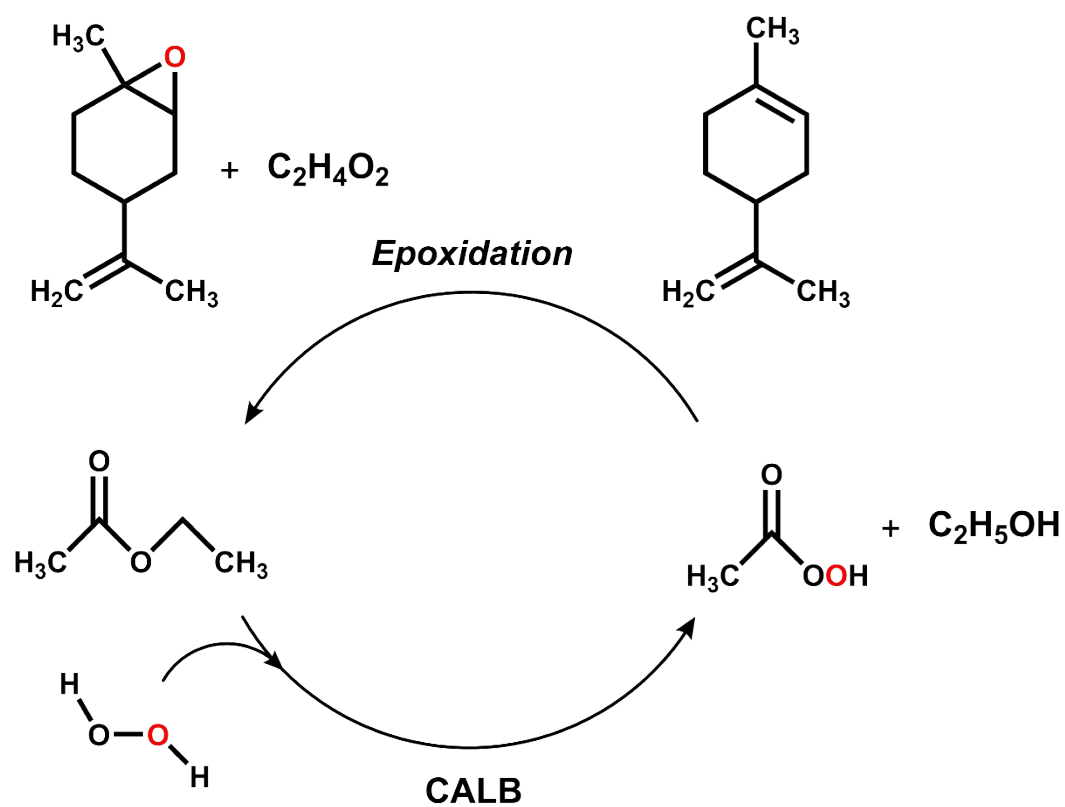

Figure S18: Epoxidation of Limonene driven by CALB and  $\text{H}_2\text{O}_2$ .

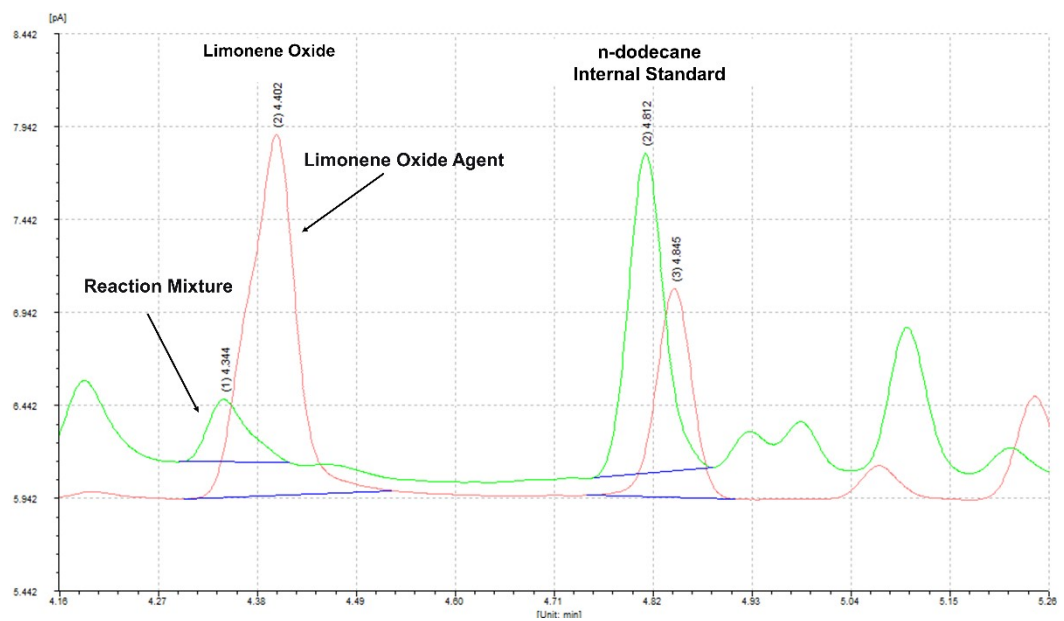

Figure S19: GC spectrum of limonene oxide agent and photo-enzyme catalytic reaction mixture.

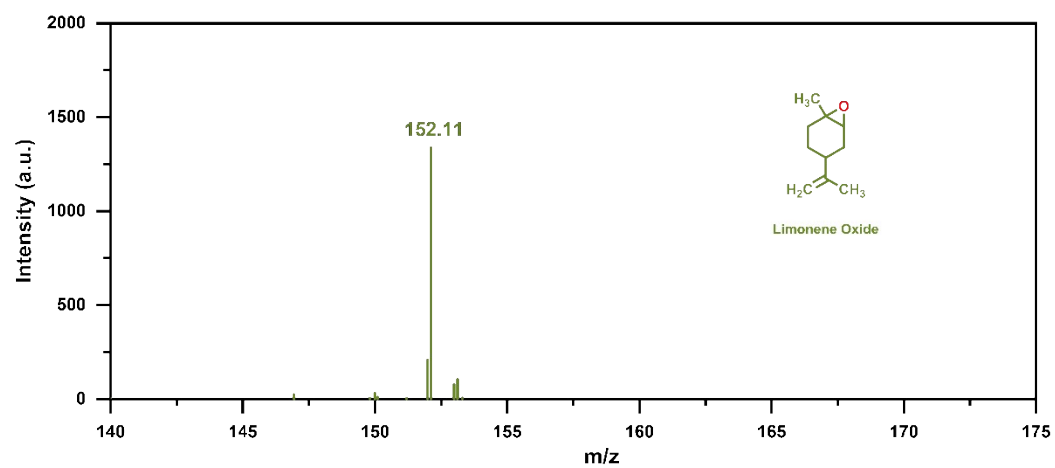

Figure S20: GC-MS spectrum of photo-enzyme catalytic reaction mixture.



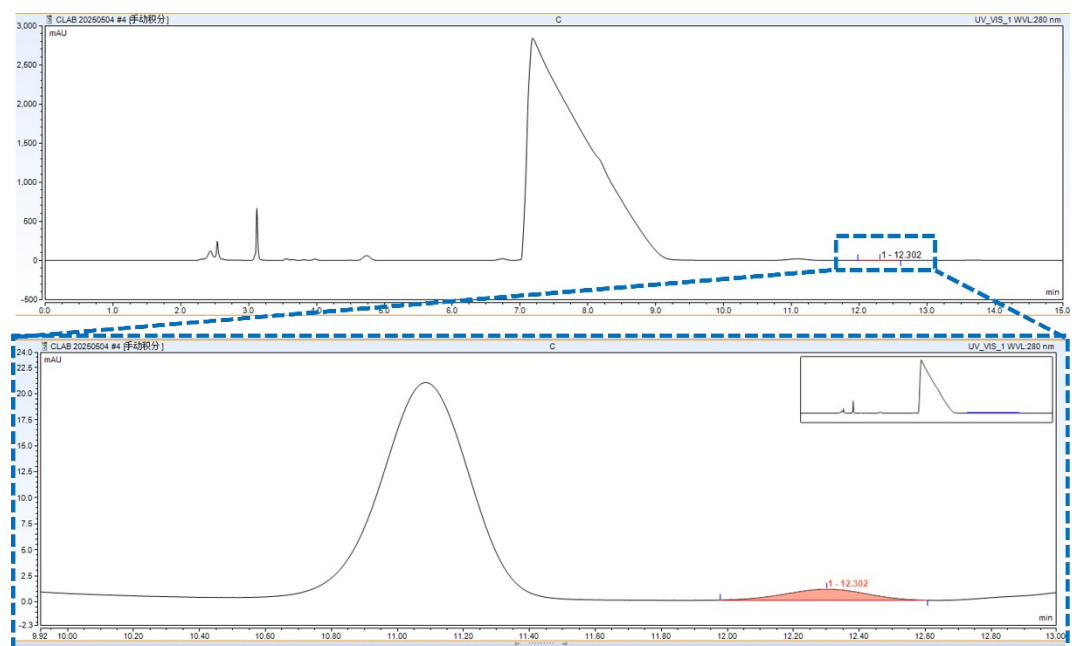

Figure S21: HPLC curves of supernatant during SCZ-200 preparation.

Table S1: TOF comparisons of this work with references

| Photo Catalysts                                                           | Light  | Sacrificial agent | Gas atmosphere | Production rate<br>( $\mu\text{mol}\cdot\text{g}^{-1}\cdot\text{h}^{-1}$ ) | Production pathway | Ref. |
|---------------------------------------------------------------------------|--------|-------------------|----------------|----------------------------------------------------------------------------|--------------------|------|
| SAS@ZIF-8                                                                 | Vis    |                   | O <sub>2</sub> | 635                                                                        | ORR, WOR           | This |
|                                                                           | Vis    | Ethanol           | O <sub>2</sub> | 3556                                                                       | followed by ORR    | Work |
| C <sub>3</sub> N <sub>4</sub> /ZIF-8                                      | Vis    | No                | O <sub>2</sub> | 2641                                                                       | ORR, WOR           | [4]  |
| MIL-125-Rn                                                                | Vis    | Benzyl alcohol    | O <sub>2</sub> | 313                                                                        | Indirect ORR       | [5]  |
| Pd/Uio-66-NH <sub>2</sub>                                                 | Vis    | No                | O <sub>2</sub> | 1740                                                                       | ORR                | [6]  |
| Ni/Hf-Uio-66-NH <sub>2</sub>                                              | Vis    | No                | O <sub>2</sub> | 37                                                                         | Indirect ORR, WOR  | [7]  |
| C <sub>3</sub> N <sub>4</sub> /Ni-CAT                                     | Vis    | No                | O <sub>2</sub> | 1801                                                                       | Indirect ORR       | [8]  |
| ZnIn <sub>2</sub> S <sub>4</sub> /MIL-88B(Fe)-NH <sub>2</sub>             | Vis    | No                | Air            | 209                                                                        | Indirect ORR       | [9]  |
| ZnS/MIL-125-NH <sub>2</sub>                                               | Vis    | Benzyl alcohol    | O <sub>2</sub> | 600                                                                        | Indirect ORR       | [10] |
| TiO <sub>2</sub> /MIL-125-NH <sub>2</sub> /Ti <sub>3</sub> C <sub>2</sub> | Vis    | Isopropanol       | O <sub>2</sub> | 278                                                                        | ORR, WOR           | [11] |
| C/N-ZnO-NixPy                                                             | UV-vis | Ethanol           | O <sub>2</sub> | 2495                                                                       | ORR                | [12] |
| TiO <sub>2</sub> @RF                                                      | Solar  | No                | O <sub>2</sub> | 999                                                                        | Indirect ORR       | [13] |
| CdSe/KPN-HCP                                                              | Vis    | No                | O <sub>2</sub> | 900                                                                        | ORR                | [14] |
| Sulfur-Contained Resin                                                    | Salar  | No                | O <sub>2</sub> | 1405                                                                       | ORR, WOR           | [15] |
| D-A polymers                                                              | UV-vis | Ethanol           | Air            | 2552.5                                                                     | ORR                | [16] |
| D-A structured BBT-ACN COF-1                                              | Vis    | No                | Air            | 2500                                                                       | Indirect ORR       | [17] |
| $\pi$ -A structured BBT-ACN COF-2                                         | Vis    | No                | Air            | 910                                                                        | Indirect ORR       | [17] |
| Ru@Cu-HHTP                                                                | Vis    | Ethanol           | O <sub>2</sub> | 570.9                                                                      | ORR                | [18] |
| a Cv-PCN supramolecular                                                   | Salar  | No                | Air            | 2063.21(triphase system)                                                   | ORR                | [19] |

|                                      |     |             |                |         |     |      |
|--------------------------------------|-----|-------------|----------------|---------|-----|------|
| carbazole-based polymers             | Vis | isopropanol | Air            | 1719.03 | ORR | [20] |
| Bi <sub>3.6</sub> K <sub>3</sub> -CN | Vis | Ethanol     | O <sub>2</sub> | 1207.72 | ORR | [21] |

## Reference

- [1] Y. Liu, S. Cui, W. Ma, et al., *J. Am. Chem. Soc.*, 146 (2024) 12565-12576.
- [2] Y. Zhao, Y. Liu, J. Cao, et al., *Appl. Catal. B-Environ.*, 278 (2020) 119289.
- [3] G. Kresse and J. Furthmüller, *Phys. Rev. B: Condens. Matter Mater. Phys.*, 1996, 54, 11169–11186.
- [4] J. P. Perdew, K. Burke and M. Ernzerhof, *Phys. Rev. Lett.*, 1996, 77, 3865–3868.
- [5] Y. Isaka, Y. Kawase, Y. Kuwahara, et al., *Angew. Chem. Int. Ed.*, 58 (2019) 5402-5406.
- [6] Y.-C. Hao, L.-W. Chen, J. Li, et al., *Nat. Commun.*, 12 (2021) 2682.
- [7] Y. Kondo, K. Honda, Y. Kuwahara, et al., *ACS Catal.*, 12 (2022) 14825-14835.
- [8] Y. Zhao, Y. Liu, Z. Wang, et al., *Appl. Catal. B-Environ.*, 289 (2021) 120035.
- [9] M. Liu, Z. Xing, H. Zhao, et al., *J. Hazard. Mater.*, 437 (2022) 129436.
- [10] C. Liu, T. Bao, L. Yuan, et al., *Adv. Funct. Mater.*, 32 (2022) 2111404.
- [11] Y. Wu, X. Li, Q. Yang, et al., *Chem. Eng. J.*, 390 (2020) 124519.
- [12] A. Ray, S. Subudhi, S.P. Tripathy, et al., *Adv. Mater. Inter.*, 9 (2022) 2201440.
- [13] C. Xia, L. Yuan, H. Song, et al., *Small*, 19 (2023) 2300292.
- [14] X. Li, B. Kang, F. Dong, et al., *Nano Energy*, 81 (2021) 105671.
- [15] C. Zhao, H. Li, Y. Yin, et al., *Angew. Chem. Int. Ed.*, 64 (2025) e202420895.
- [16] C. Yang, Y. Xiang, W. Wang, et al., *Appl. Catal. B-Environ.*, 365 (2025) 124856.
- [17] X. Wang, H. Li, S. Zhou, et al., *Adv. Funct. Mater.*, (2025) 2424035.
- [18] C. Feng, J. Alharbi, M. Hu, et al., *Adv. Mater.*, 37 (2025) 2406748.
- [19] S. Yan, Y. Li, X. Yang, et al., *Adv. Mater.*, 36 (2024) 2307967.
- [20] X. Xia, J. Feng, Z. Zhong, et al., *Adv. Funct. Mater.*, 34 (2024) 2311987.
- [21] H. Liang, A. Wang, R. Cheng, et al., *Chem. Eng. J.*, 489 (2024) 151145.
